# Supplementary material for: Quantification of heterotypic granule fusion in human neutrophils by imaging flow cytometry
Source: PubMed Central journal article supplement (PMC4707292; doi:10.1016/j.dib.2015.12.003), 2015-12-17
Supplement: mmc1.pdf [file mmc1.pdf]

### Conflict of Interest Form

We confirm that the manuscript has been read and approved by all named authors and that there are no other persons who satisfied the criteria for authorship but are not listed. We further confirm that the order of authors listed in the manuscript has been approved by all of us.

We confirm that we have given due consideration to the protection of intellectual property associated with this work and that there are no impediments to publication, including the timing of publication, with respect to intellectual property. In so doing we confirm that we have followed the regulations of our institutions concerning intellectual property.

We further confirm that any aspect of the work covered in this manuscript that has involved either experimental animals or human patients has been conducted with the ethical approval of all relevant bodies and that such approvals are acknowledged within the manuscript.

We understand that the Corresponding Author is the sole contact for the Editorial process (including Editorial Manager and direct communications with the office). He/she is responsible for communicating with the other authors about progress, submissions of revisions and final approval of proofs.

Signed by all authors as follows:

Halla Björnsdóttir  30/11 2015  
Amanda Welin  29/11-15  
Claes Dahlgren  30/11-15  
Anna Karlsson   
Johan Bylund  30/11-15
